# Supplementary material for: Electrophysiological correlates of distance and direction processing during cognitive map retrieval: A source analysis
Source: PubMed Central journal article supplement (PMC9992539; doi:10.3389/fnhum.2023.1062064), 2023-02-22
Supplement: Table_1.pdf [file Table_1.pdf]

## Robust Paired Samples T-Test

|                                         |                                          | <b>t</b> | <b>df</b> | <b>p</b> |
|-----------------------------------------|------------------------------------------|----------|-----------|----------|
| parietal left question distance         | parietal left question direction         | -5.54    | 17.0      | <.001    |
| parietal right question distance        | parietal right question direction        | -8.97    | 17.0      | <.001    |
| temporal left question distance         | temporal left question direction         | -6.83    | 17.0      | <.001    |
| temporal right question distance        | temporal right question direction        | -5.16    | 17.0      | <.001    |
| temporal pole left question distance    | temporal pole left question direction    | -7.82    | 17.0      | <.001    |
| temporal pole right question distance   | temporal pole right question direction   | -6.47    | 17.0      | <.001    |
| parahippocampus left question distance  | parahippocampus left question direction  | -6.03    | 17.0      | <.001    |
| parahippocampus right question distance | parahippocampus right question direction | -5.51    | 17.0      | <.001    |
| frontal left question distance          | frontal left question direction          | -5.84    | 17.0      | <.001    |
| frontal right question distance         | frontal right question direction         | -5.02    | 17.0      | <.001    |
| parietal left response distance         | parietal left response direction         | -5.43    | 17.0      | <.001    |
| parietal right response distance        | parietal right response direction        | -6.88    | 17.0      | <.001    |
| temporal left response distance         | temporal left response direction         | -4.12    | 17.0      | <.001    |
| temporal right response distance        | temporal right response direction        | -4.76    | 17.0      | <.001    |
| temporal pole left response distance    | temporal pole left response direction    | -3.02    | 17.0      | 0.008    |
| temporal pole right response distance   | temporal pole right response direction   | -2.57    | 17.0      | 0.020    |
| parahippocampus left response distance  | parahippocampus left response direction  | -4.07    | 17.0      | <.001    |
| parahippocampus right response distance | parahippocampus right response direction | -4.03    | 17.0      | <.001    |
| frontal left response distance          | frontal left response direction          | -7.28    | 17.0      | <.001    |
| frontal right response distance         | frontal right response direction         | -4.04    | 17.0      | <.001    |
