# Supplementary material for: Electrophysiological correlates of distance and direction processing during cognitive map retrieval: A source analysis
Source: PubMed Central journal article supplement (PMC9992539; doi:10.3389/fnhum.2023.1062064), 2023-02-22
Supplement: Table_2.pdf [file Table_2.pdf]

## Paired Samples T-Test

|                                         |                                          |             | <b>Statistic</b> | <b>df</b> | <b>p</b> |
|-----------------------------------------|------------------------------------------|-------------|------------------|-----------|----------|
| parietal left question distance         | parietal left question direction         | Student's t | -5.47            | 29.0      | <.001    |
|                                         |                                          | Wilcoxon W  | 0.00             |           | <.001    |
| parietal right question distance        | parietal right question direction        | Student's t | -10.76           | 29.0      | <.001    |
|                                         |                                          | Wilcoxon W  | 0.00             |           | <.001    |
| temporal left question distance         | temporal left question direction         | Student's t | -5.12            | 29.0      | <.001    |
|                                         |                                          | Wilcoxon W  | 0.00             |           | <.001    |
| temporal right question distance        | temporal right question direction        | Student's t | -6.93            | 29.0      | <.001    |
|                                         |                                          | Wilcoxon W  | 0.00             |           | <.001    |
| temporal pole left question distance    | temporal pole left question direction    | Student's t | -3.26            | 29.0      | 0.003    |
|                                         |                                          | Wilcoxon W  | 22.00            |           | <.001    |
| temporal pole right question distance   | temporal pole right question direction   | Student's t | -3.13            | 29.0      | 0.004    |
|                                         |                                          | Wilcoxon W  | 7.00             |           | <.001    |
| parahippocampus left question distance  | parahippocampus left question direction  | Student's t | -5.12            | 29.0      | <.001    |
|                                         |                                          | Wilcoxon W  | 0.00             |           | <.001    |
| parahippocampus right question distance | parahippocampus right question direction | Student's t | -4.10            | 29.0      | <.001    |
|                                         |                                          | Wilcoxon W  | 0.00             |           | <.001    |
| frontal left question distance          | frontal left question direction          | Student's t | -3.68            | 29.0      | <.001    |
|                                         |                                          | Wilcoxon W  | 3.00             |           | <.001    |
| frontal right question distance         | frontal right question direction         | Student's t | -3.85            | 29.0      | <.001    |
|                                         |                                          | Wilcoxon W  | 3.00             |           | <.001    |
| parietal left response distance         | parietal left response direction         | Student's t | -5.74            | 29.0      | <.001    |
|                                         |                                          | Wilcoxon W  | 0.00             |           | <.001    |
| parietal right response distance        | parietal right response direction        | Student's t | -10.22           | 29.0      | <.001    |
|                                         |                                          | Wilcoxon W  | 0.00             |           | <.001    |
| temporal left response distance         | temporal left response direction         | Student's t | -3.48            | 29.0      | 0.002    |
|                                         |                                          | Wilcoxon W  | 27.00            |           | <.001    |
| temporal right response distance        | temporal right response direction        | Student's t | -5.85            | 29.0      | <.001    |
|                                         |                                          | Wilcoxon W  | 11.00            |           | <.001    |
| temporal pole left response distance    | temporal pole left response direction    | Student's t | -3.61            | 29.0      | 0.001    |
|                                         |                                          | Wilcoxon W  | 19.00            |           | <.001    |
| temporal pole right response distance   | temporal pole right response direction   | Student's t | -3.63            | 29.0      | 0.001    |
|                                         |                                          | Wilcoxon W  | 26.00            |           | <.001    |
| parahippocampus left response distance  | parahippocampus left response direction  | Student's t | -5.45            | 29.0      | <.001    |

Paired Samples T-Test

|                                            |                                             |               | <b>Statistic</b> | <b>df</b> | <b>p</b> |
|--------------------------------------------|---------------------------------------------|---------------|------------------|-----------|----------|
|                                            |                                             | Wilcoxon<br>W | 13.00            |           | <.001    |
| parahippocampus right response<br>distance | parahippocampus right response<br>direction | Student's t   | -5.54            | 29.0      | <.001    |
|                                            |                                             | Wilcoxon<br>W | 10.00            |           | <.001    |
| frontal left response distance             | frontal left response direction             | Student's t   | -5.56            | 29.0      | <.001    |
|                                            |                                             | Wilcoxon<br>W | 0.00             |           | <.001    |
| frontal right response distance            | frontal right response direction            | Student's t   | -4.82            | 29.0      | <.001    |
|                                            |                                             | Wilcoxon<br>W | 25.00            |           | <.001    |
